# Supplementary material
Source: Springer Nature journal article supplement (https://www.springermedizin.de/resource/supplementary/12885_2008_1528_MOESM3_ESM.pdf/9472246)

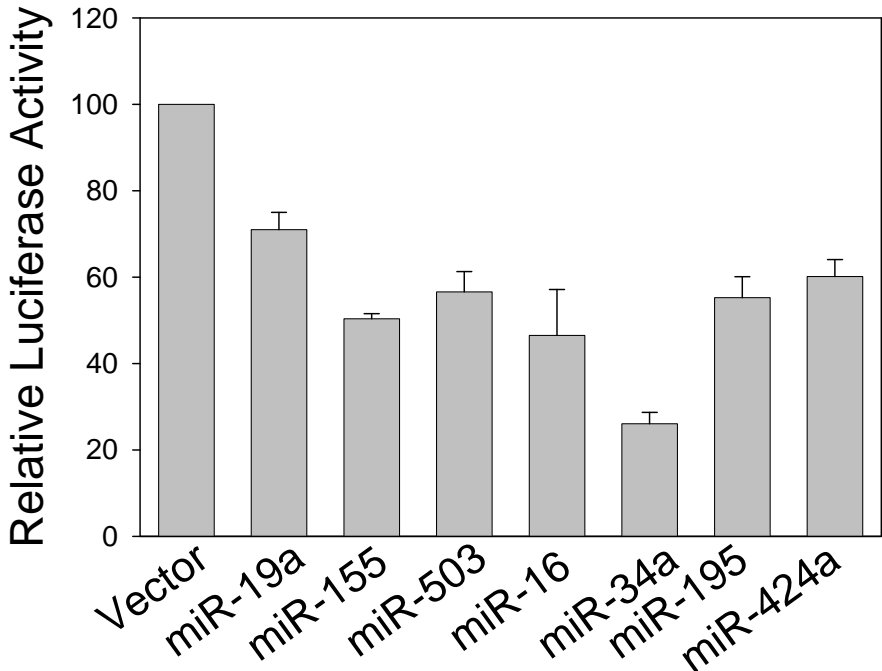

Supplement: MOESM3 [file 9472246]
